# Supplementary material for: Hot-Pressed Super-Elastic Graphene Aerogel with Bidirectional Thermal Conduction Properties as Thermal Interface Materials
Source: Preprints.org preprint supplement (doi:10.20944/preprints202311.0290.v1), 2023-11-06
Supplement: Supplementary file 1 [file supplementary]

Hot-pressed super-elastic graphene aerogel with bidirectional thermal conduction properties as thermal interface materials

Peng Lv, Xiaofeng Zhou, Songyue Chen

College of Electronic and Optical Engineering & College of Flexible Electronics (Future Technology), Nanjing University of Posts and Telecommunications, Nanjing 210023, China


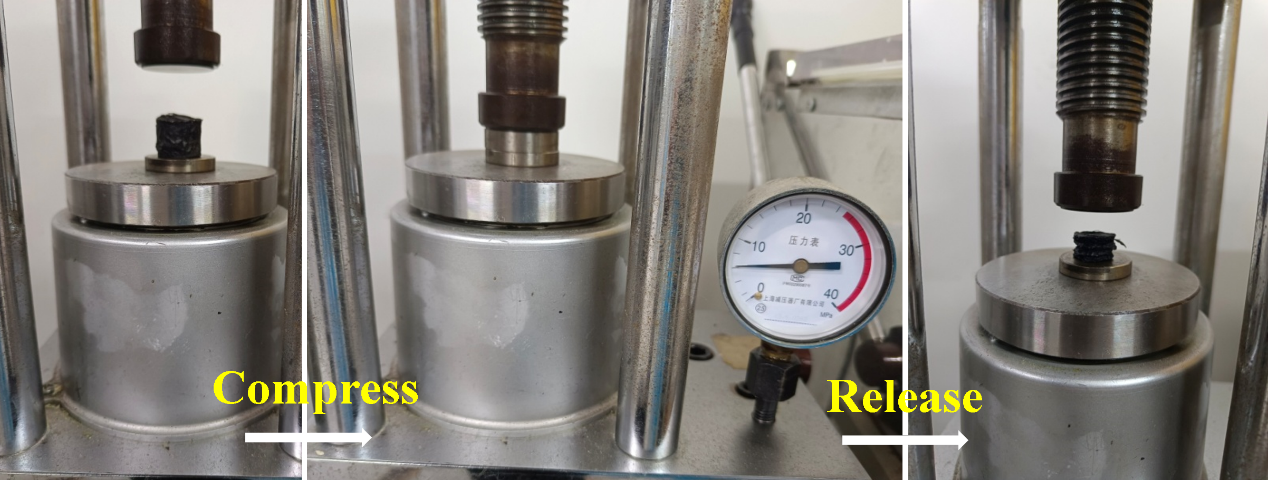


Figure S1 Real-time photos of the compression-recovery process of rGOA.


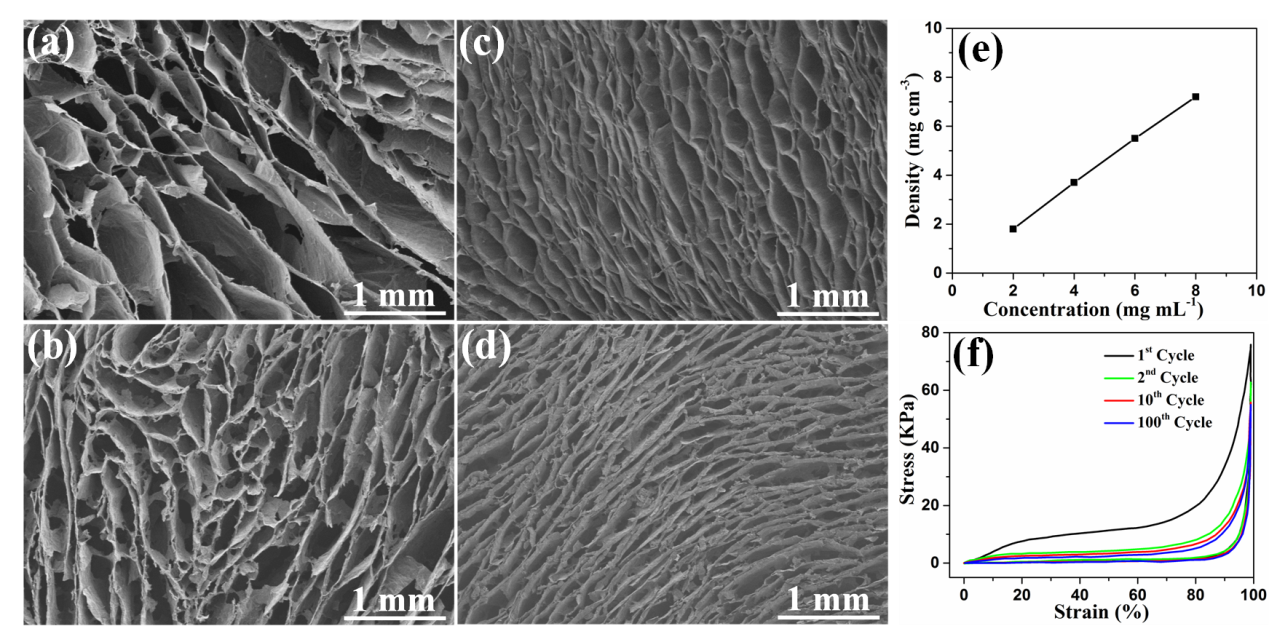


Figure S2 SEGAs prepared with GO concentration of (a) 2 mg mL-1, (b) 4 mg mL-1, (c) 6 mg mL-1, (d) 8 mg mL-1; (e) Plot of the density of SEGAs versus the GO concentration; (f) Compressive stress of SEGA with density of 7.2 mg cm-2 at strain of 99% for 100 compress/release cycles.


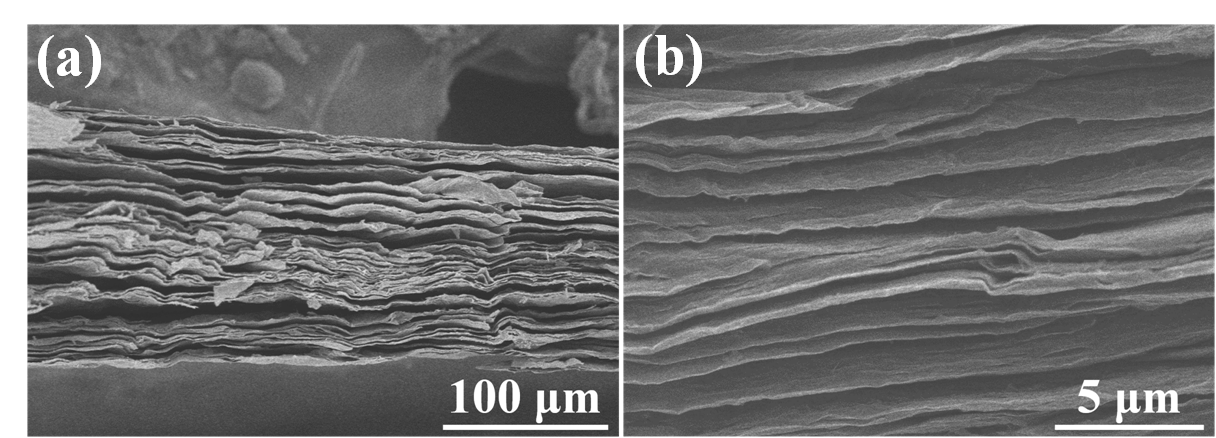


Figure S3 Cross-sectional SEM images of GFs prepared from GO films.


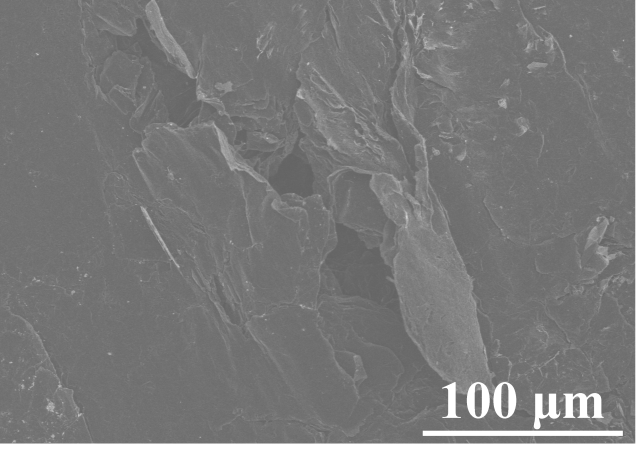


Figure S4 SEM images of surface change of commercial GF after bending test.
